# Supplementary material for: Comparison of the protective effectiveness of NPQ in Arabidopsis plants deficient in PsbS protein and zeaxanthin
Source: PubMed Central journal article supplement (PMC4339590; doi:10.1093/jxb/eru477), 2014-11-26
Supplement: supp_eru477_jexbot135582_file001.pdf [file supp_eru477_jexbot135582_file001.pdf]

## Comparison of the protective effectiveness of NPQ in *Arabidopsis* plants deficient in PsbS protein and zeaxanthin.

Maxwell A. Ware, Erica Belgio and Alexander V. Ruban<sup>#</sup>

School of Biological and Chemical Sciences, Queen Mary University of London, Mile End Road, London E1 4NS, UK

<sup>#</sup>Correspondence: [a.ruban@qmul.ac.uk](mailto:a.ruban@qmul.ac.uk)

### Supporting information

#### Supplemental Figure 1 - Ware *et al.*

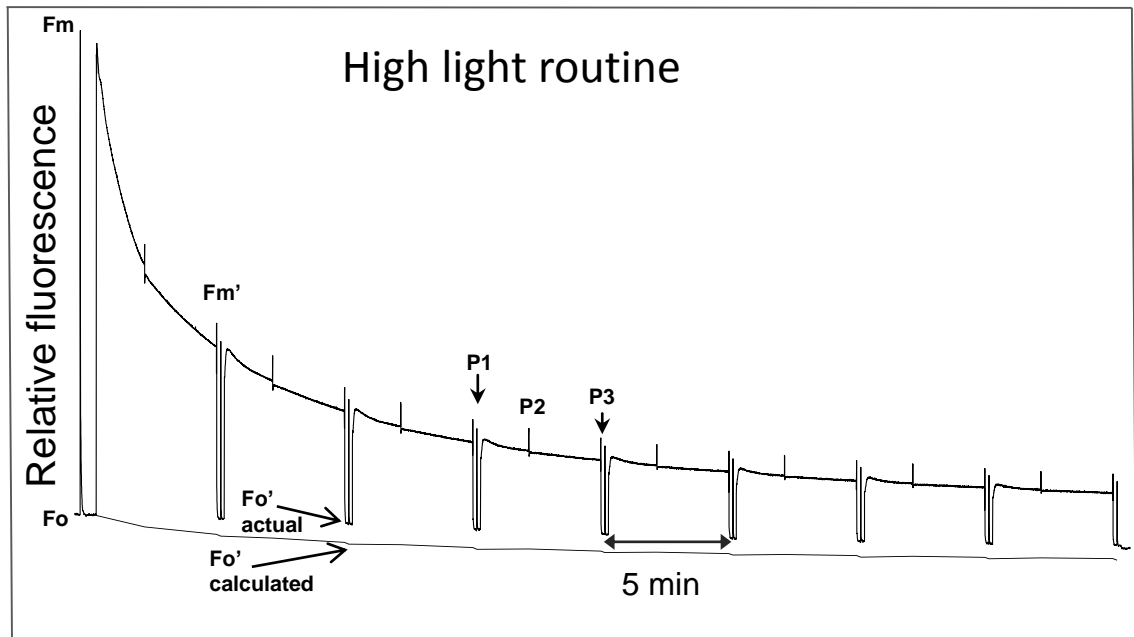

**Figure S1** Scheme of induction of chlorophyll fluorescence from an *npq4* plant with eight step constant  $1500 \mu\text{mol m}^{-2} \text{s}^{-1}$  light routine. For detailed explanation of routine development see Ruban & Belgio (2014). P1 illustrates the saturating pulse (SP) before actinic light (AL), P2 during AL, and P3 after AL and far red (FR). All parameters measured were done so at P1. The difference between actual and calculated  $F_o'$  was used to calculate  $qP_d$ . See 'Materials and methods' for a detailed description. The timing scheme of the  $qP_d$  calculation and darkness step of the routine is: (AL off)(FR on)-(7 s)-(SP)-(5 s)-(AL on/FR off).

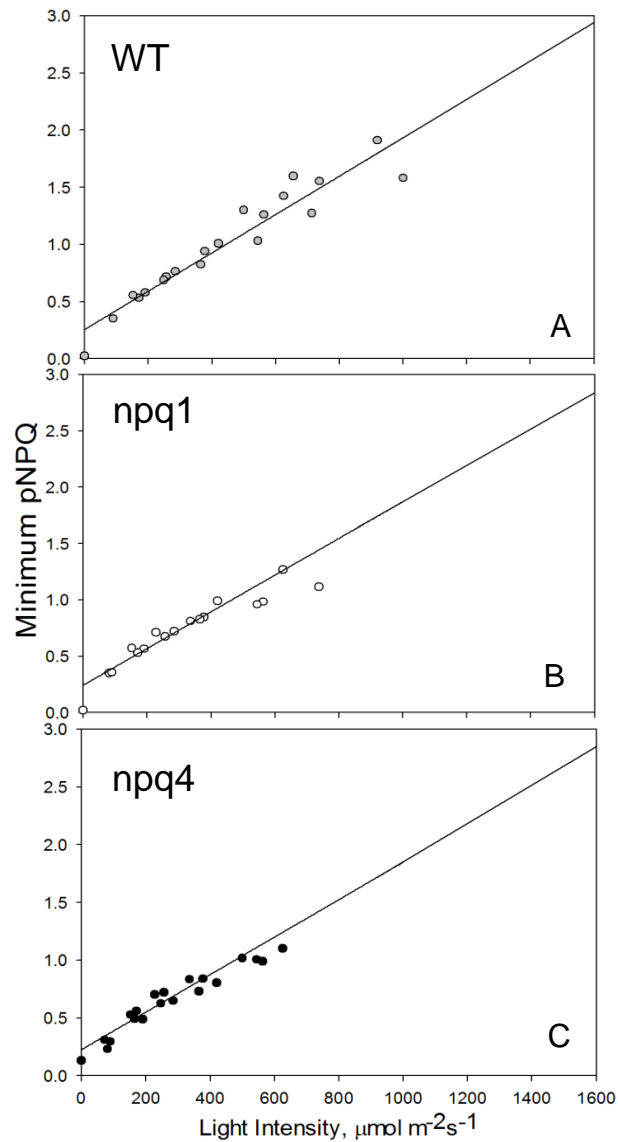

**Figure S2** Relationship between maximum protective capacity and light intensity during a gradually increasing routine (see Fig. 1 and in text description). The straight line (Standard Curves, Linear Curve;  $f = y_0 + a \cdot x$ ) was plotted using the regression analysis on SigmaPlot12 (Systat Software, Inc., Chicago, USA). Data points were taken from Fig. 5 representing the lowest NPQ value corresponding to  $q_{Pd} > 0.98$  at a given light intensity for **A** WT ( $f = 0.2566 + 0.0017 \cdot x$ ) **B** *npq1* ( $f = 0.2437 + 0.0016 \cdot x$ ) **C** *npq4* ( $f = 0.2267 + 0.0016 \cdot x$ ). The gradient can therefore be used to estimate the minimum NPQ needed for 100% RC protection at each actinic light intensity.

# Supplemental Figure 3 - Ware *et al.*

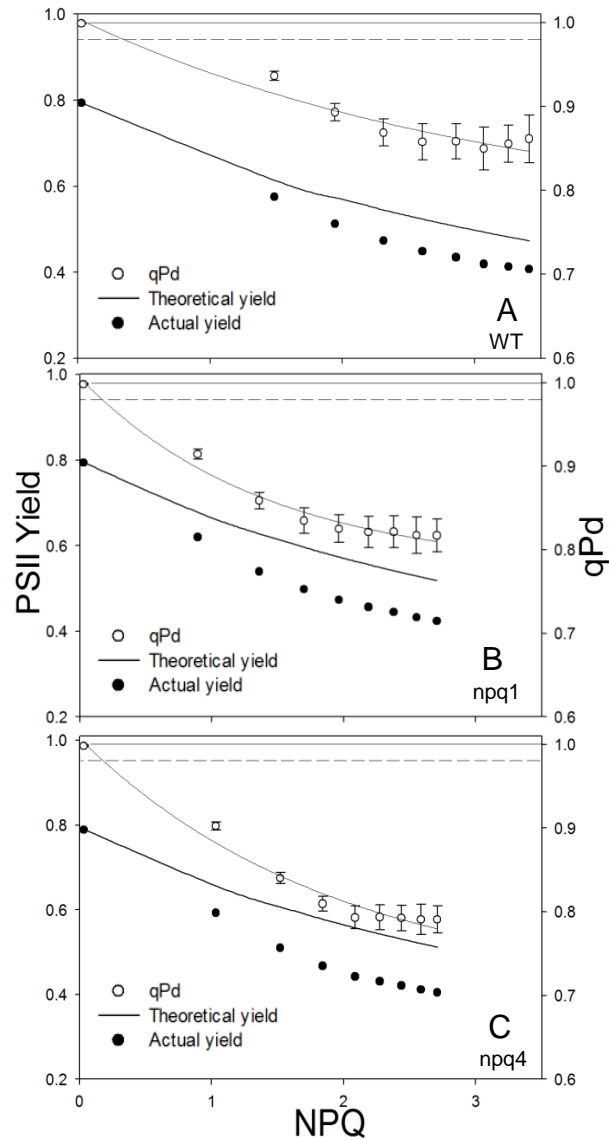

**Figure S3** Relationship between PSII yield, qPd and NPQ under a constant  $1500 \mu\text{mol m}^{-2} \text{s}^{-1}$  light routine on **A** WT, **B** *npq1* and **C** *npq4* *Arabidopsis* intact leaves. The figure also explains the actual and theoretical relationship between NPQ and  $\Phi\text{PSII}$ . The equation used to describe this relationship is explained in the methods. Error bars illustrate SEM (n = 5).

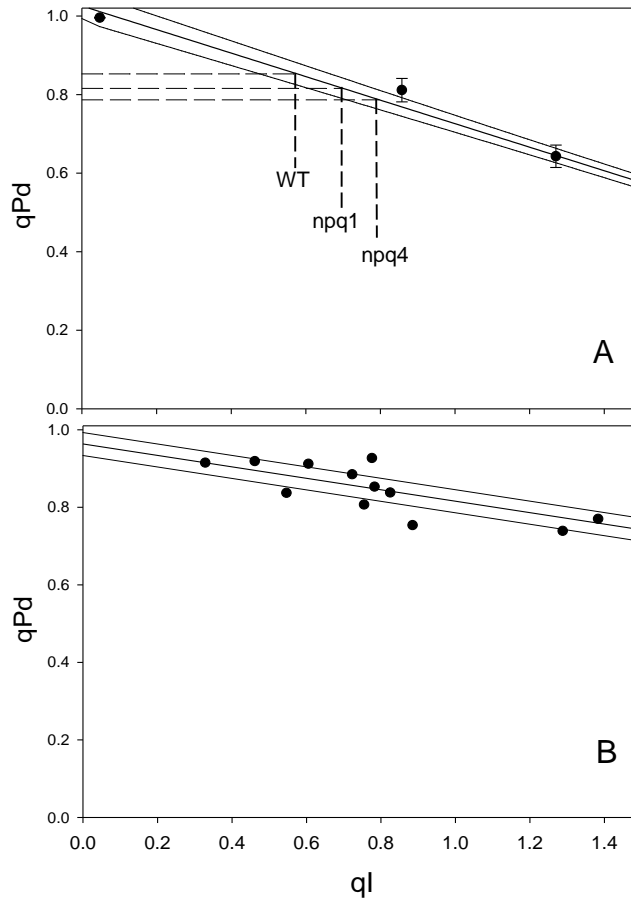

**Figure S4 A** Relationship between photoinhibitory NPQ (qI) and qPd for detached leaves infiltrated with nigericin illuminated with a constant  $1500 \mu\text{mol m}^{-2} \text{s}^{-1}$  light routine. Extrapolation lines are included for all genotypes to show the relationship between qPd and qI. Error bars represent the SEM (n = 5). The regression line (Standard Curves, Linear Curve;  $f = y_0 + a \cdot x$ ) was plotted using SigmaPlot12 (Systat Software, Inc., Chicago, USA). **B** Depicts the routine described in Fig. S1; however, after the routine had finished the measuring light remained on for 1 hr, with an SP being applied every 10 min. The final qPd and NPQ values recorded for 14 separate whole intact leaf measurements were plotted. The regression line and 95% confidence interval (Standard Curves, Linear Curve;  $f = y_0 + a \cdot x$ ) were plotted using SigmaPlot12 (Systat Software, Inc., Chicago, USA).
